# Supplementary material
Source: PubMed Central journal article supplement (PMC3583509)
Supplement: supp_112.199646_JPET199646_Supplemental_Figure_1.pdf [file supp_112.199646_JPET199646_Supplemental_Figure_1.pdf]

**Title:** Optimization of angiostatic peptidomimetic 6DBF7, an allosteric inhibitor of galectin-1

**By:** Ruud P.M. Dings, Nigam Kumar, Michelle Miller, Melissa Loren, Huzaifa Rangwala, Thomas R. Hoye, Kevin H. Mayo

**For:** The Journal of Pharmacology and Experimental Therapeutics

**JPET MS#:** #199646

**Legend to Supplemental Figure 1.** HSQC spectrum of  $^{15}\text{N}$ -gal-1 in 20 mM potassium phosphate buffer, pH 7 (black cross-peaks) overlaid with that of  $^{15}\text{N}$ -gal-1 (red cross-peaks) in the new solution (see text).

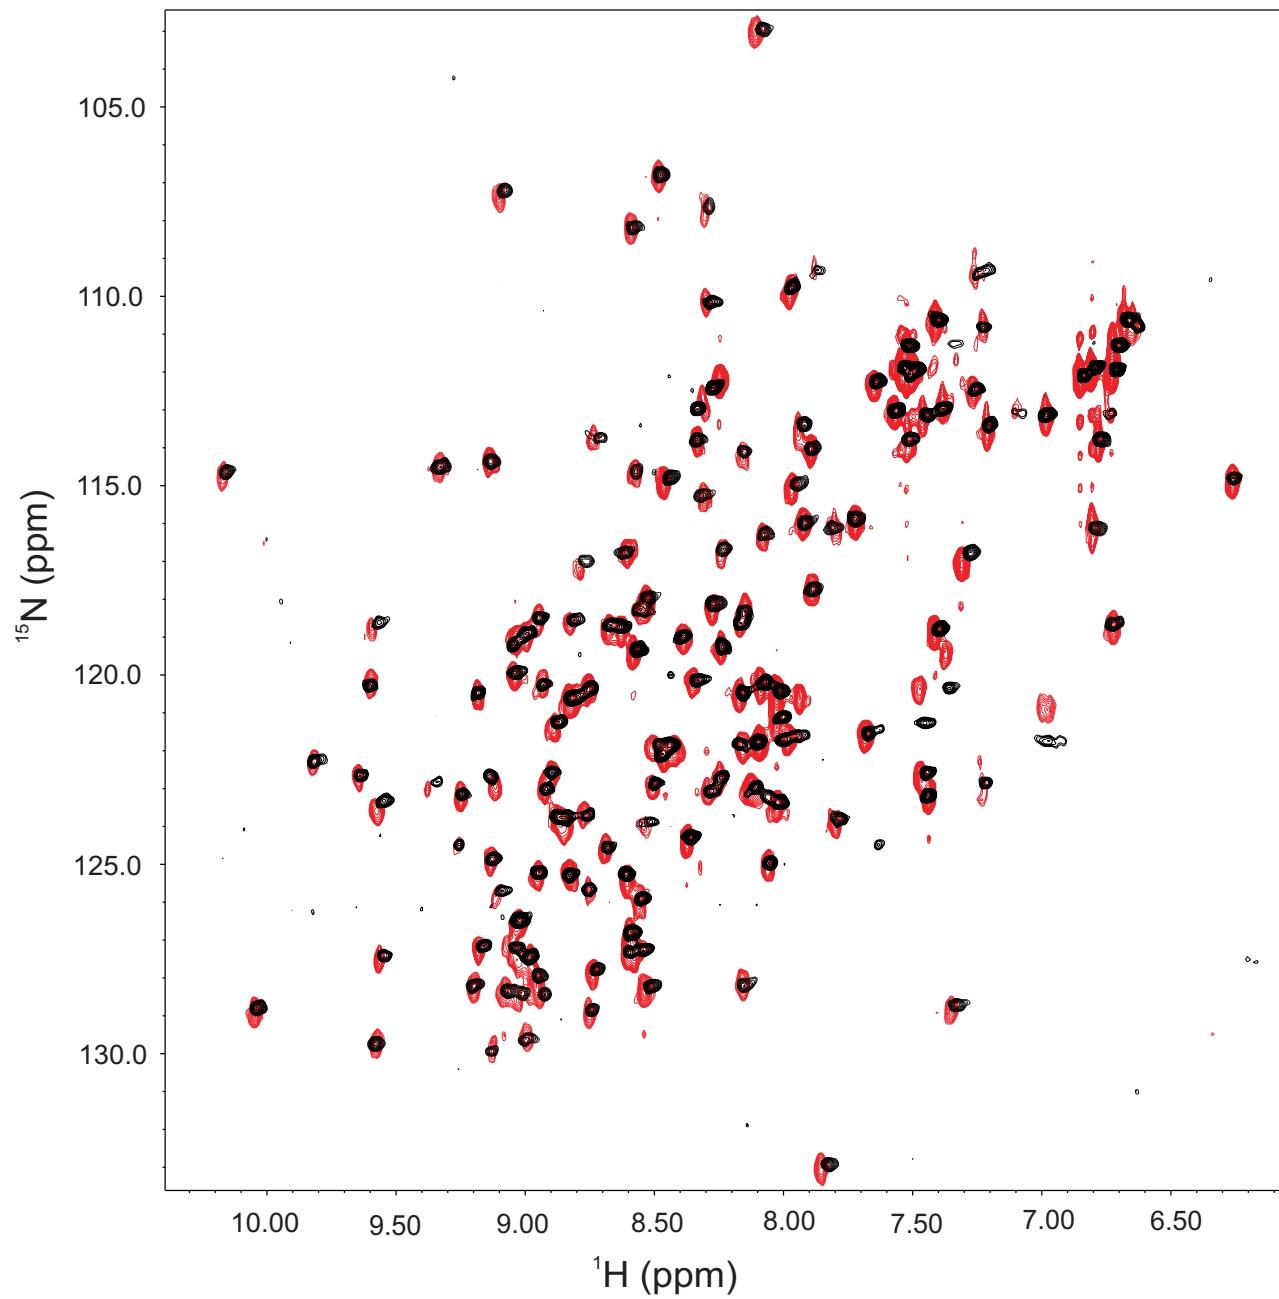

**Supplemental Figure 1**
