# Supplementary material
Source: PubMed Central journal article supplement (PMC3583509)
Supplement: supp_112.199646_JPET199646_Supplemental_Figure_2.pdf [file supp_112.199646_JPET199646_Supplemental_Figure_2.pdf]

**Title:** Optimization of angiostatic peptidomimetic 6DBF7, an allosteric inhibitor of galectin-1

**By:** Ruud P.M. Dings, Nigam Kumar, Michelle Miller, Melissa Loren, Huzaifa Rangwala, Thomas R. Hoye, Kevin H. Mayo

**For:** The Journal of Pharmacology and Experimental Therapeutics

**JPET MS#:** #199646

**Legend to Supplemental Figure 2.** Overlays of expansions from HSQC spectra of  $^{15}\text{N}$ -gal-1 (30  $\mu\text{M}$ ) in the new solution in the absence (black cross-peaks) and in the presence (red cross-peaks) of DB16 (200  $\mu\text{M}$ ).

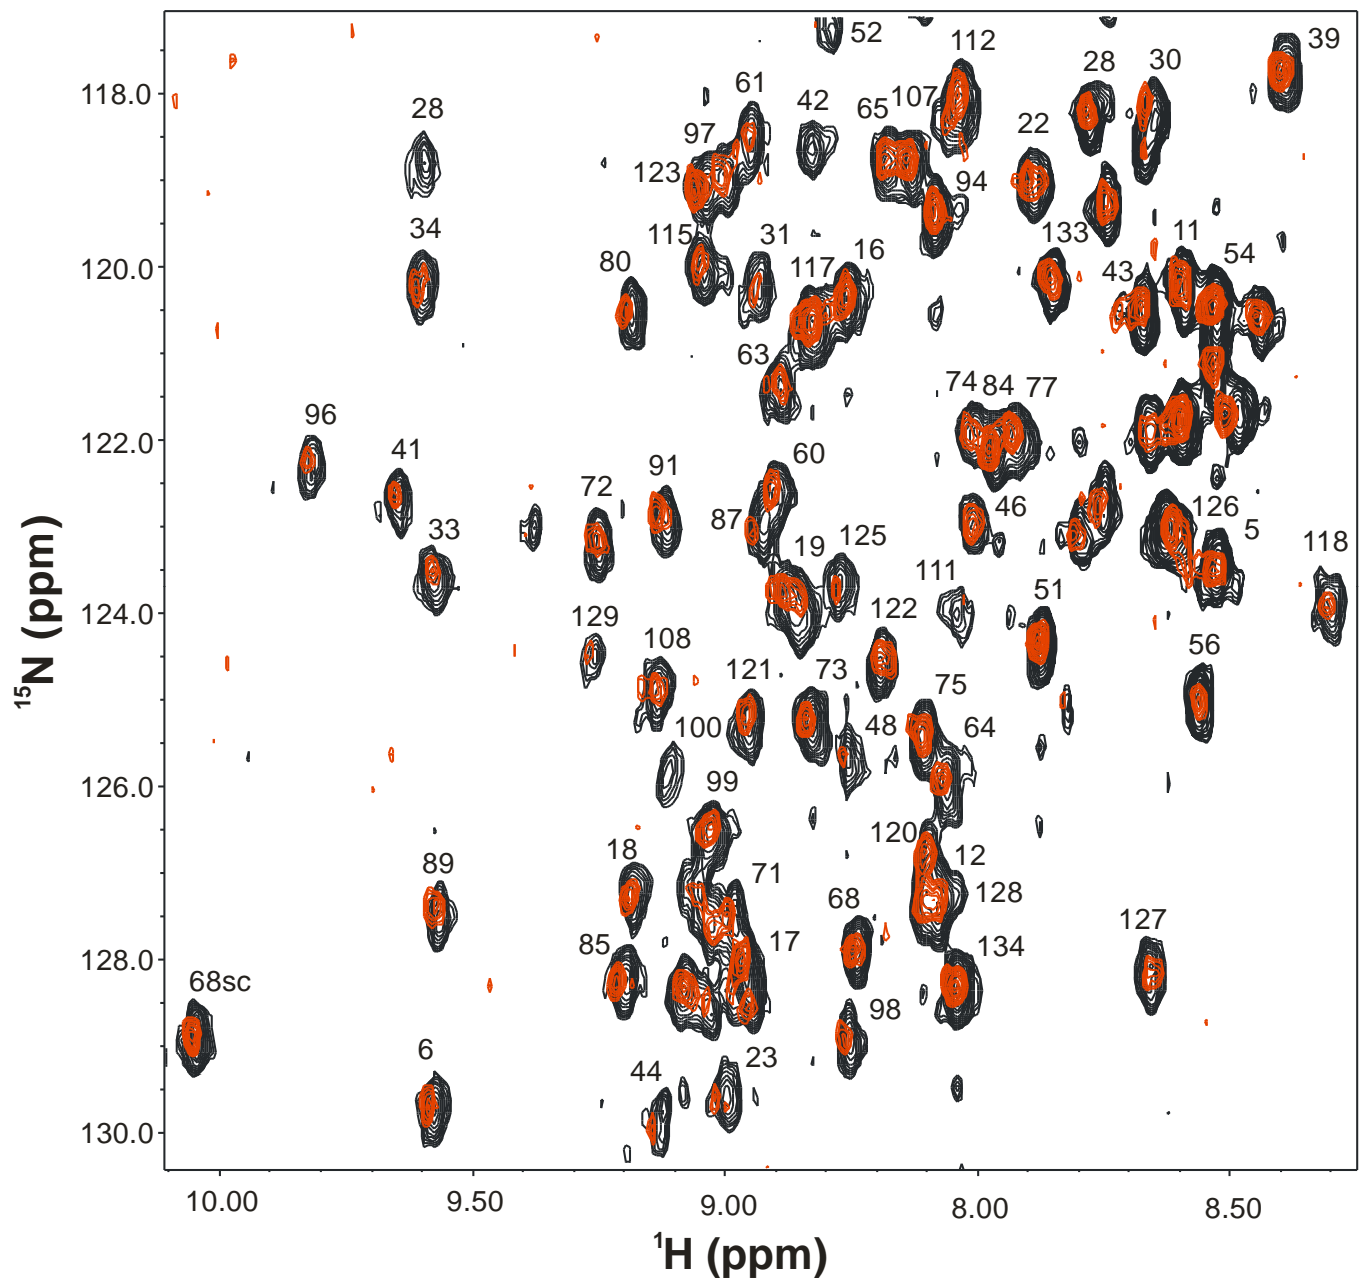

Supplemental Figure 2
